# Supplementary material for: Carbon coating and Al-doping to improve the electrochemistry of Li2CoSiO4 polymorphs as cathode materials for lithium-ion batteries
Source: Royal Society of Chemistry journal article supplement (doi:10.1039/c8ra02555j), 2018-01-01
Supplement: c8ra02555j1.pdf [file c8ra02555j1.pdf]

## Carbon coating and Al-doping to improve electrochemistry of $\text{Li}_2\text{CoSiO}_4$ polymorphs as cathode materials for lithium-ion batteries

Hongwei Du,<sup>a,b</sup> Xianhui Zhang,<sup>a,\*</sup> Zhenlian Chen,<sup>a</sup> Dongyang Wu,<sup>a,c</sup> Zhifeng Zhang,<sup>a</sup> Jun Li<sup>a,\*\*</sup>

<sup>a</sup>Nano Science and Technology Institute, University of Science and Technology of China, Suzhou 215123, China.

<sup>b</sup>Ningbo Institute of Material Technology & Engineering, Chinese Academy of Sciences, Ningbo 315201, China.

<sup>c</sup>Shanghai University, Shanghai 200444, China.

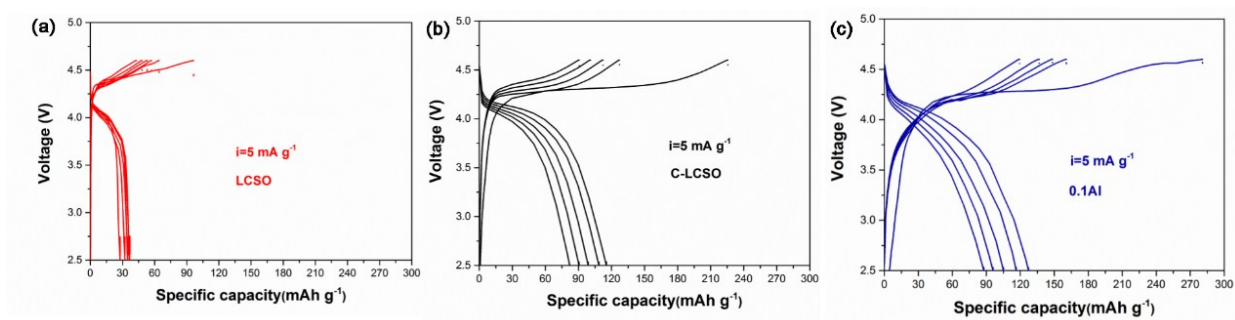

Figure S1, The voltage degradation of pure LCSO, carbon-coated C/LCSO, and Al-doping carbon coated 0.1Al-LCSO/C material samples over first five charge-discharge cycles.

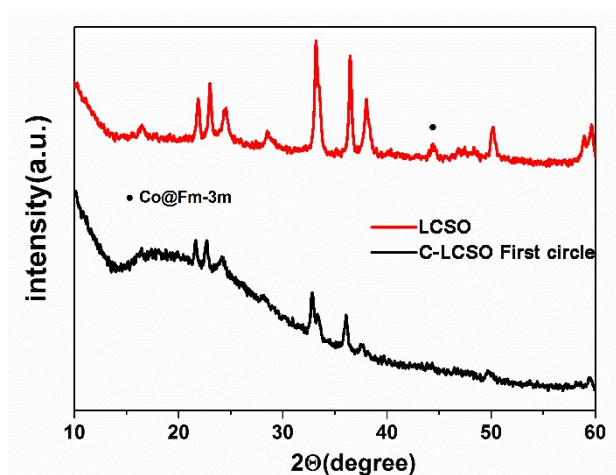

Figure S2, The XRD spectral comparison of the C-LCSO material before and after the first cycle.

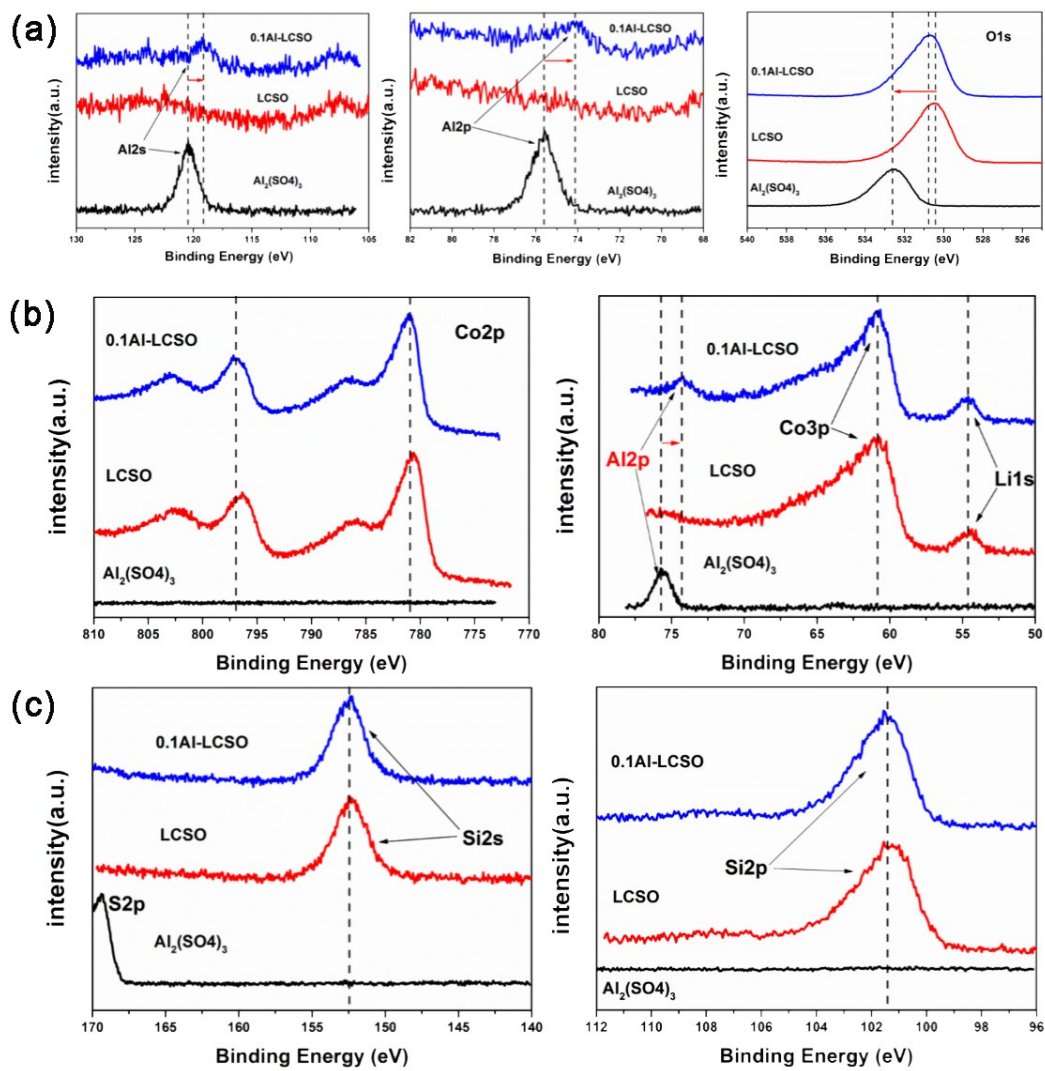

Figure S3, Figure 7 (a) Al<sub>2</sub>p, Al<sub>2</sub>s and O1s high resolution XPS spectrum of 0.1Al-LCSO, LCSO and aluminium sulphate; (b) Co<sub>2</sub>p and Co<sub>3</sub>p high resolution XPS spectrum of 0.1Al-LCSO and LCSO; (c) Si<sub>2</sub>p and Si<sub>3</sub>p high resolution XPS spectrum of 0.1Al-LCSO and LCSO.
